# Supplementary material for: Identification of a Nuclear Export Signal in the Catalytic Subunit of AMP-activated Protein Kinase
Source: PubMed Central journal article supplement — Mol Biol Cell. 2010 Oct 1;21(19):3433–42. doi: 10.1091/mbc.E10-04-0347 (PMC2947478; doi:10.1091/mbc.e10-04-0347), 2010-10-01
Supplement: E10-04-0347_1.pdf [file E10-04-0347_1.pdf]

**Supplementary Figure 1.** Leptomycin B (LMB) treatment, a specific inhibitor of CRM1-mediated nuclear export, induces accumulation of AMPK $\alpha$  carboxy tail-containing proteins in the nucleus in a time-dependent manner. HEK 293 cells transiently transfected with either 2xGFP or 2xGFP fusions containing the AMPK $\alpha$  2 C-terminal tail, the SV40 NLS, or both tail and NLS, imaged before and at indicated time points after treatment with Leptomycin-B (LMB). Bar, 10 $\mu$ m.

**Supplementary Figure 2.** Truncated AMPK $\alpha$  lacking the carboxy-terminal 23 amino acids (AMPK $\alpha\Delta$ C) associates with  $\beta/\gamma$  subunits in transfected cells by anti-myc immunoprecipitation. Western blot of anti-myc immunoprecipitations from lysates of HEK 293 cells co-transfected with HA-tagged AMPK $\beta$ , FLAG-tagged AMPK $\gamma$  (all three lanes), and either myc-tagged full-length AMPK $\alpha$ 2 (lane 1) or C-terminally truncated AMPK $\alpha\Delta$ C (lane 3). Cells with no myc-AMPK $\alpha$  were used as a negative control (lane 2).

**Supplementary Figure 3.** Total phospho-AMPK $\alpha$  levels *in vivo* are highly regulated. Transgenic expression of wild type (mCherry-AMPK $\alpha$ ) but not nuclear relatively unphosphorylated AMPK $\alpha$  (mCherry-AMPK $\alpha\Delta$ C) causes increased endogenous phospho-AMPK $\alpha$  (pAMPK $\alpha$ ). Western blot of total lysates from transgenic *Drosophila* adults expressing either Gal4 alone (control), or the respective mCherry-tagged AMPK $\alpha$  transgene probed for phospho-AMPK $\alpha$  and Lamin C (as loading control).

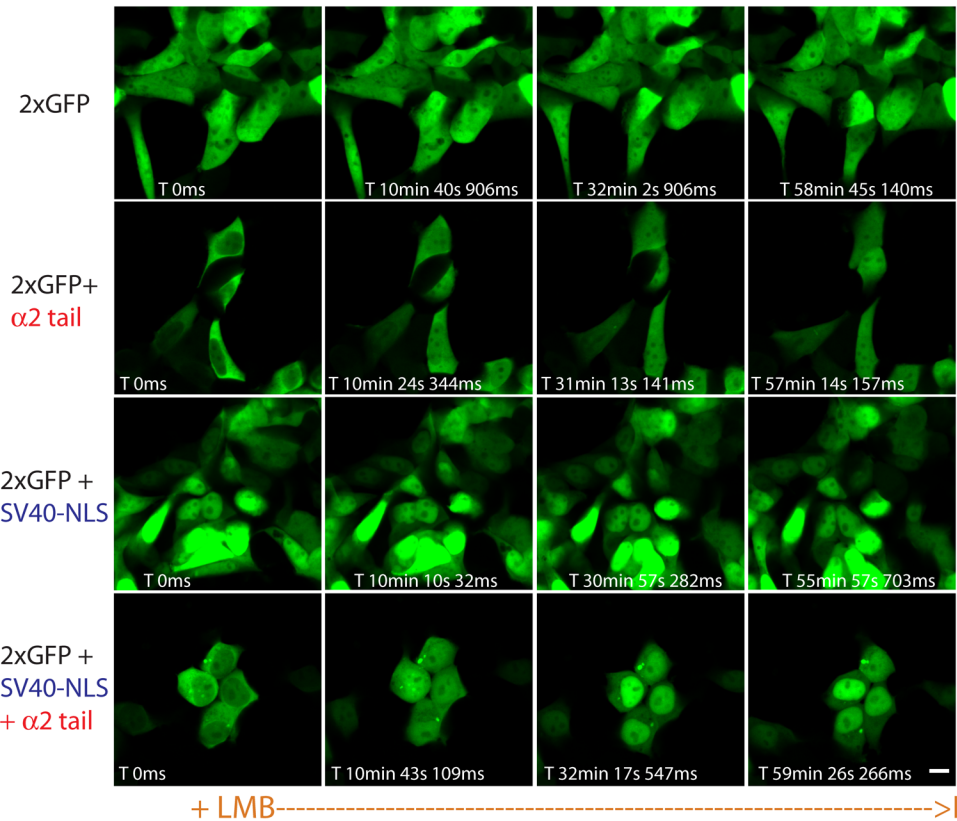

Immunoprecipitation anti-Myc

Myc-  
AMPK $\alpha$ 2

NT  
 $\alpha$ 2

Myc-  
AMPK $\alpha\Delta$ C

Myc-alpha2

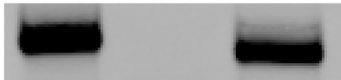

HA-beta1

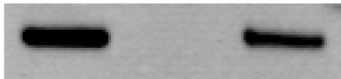

FLAG-gamma1

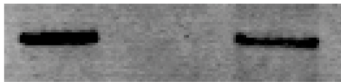

Western

Gal4    mCherry    mCherry-  
only    -AMPK $\alpha$     AMPK $\alpha$   $\Delta$ C

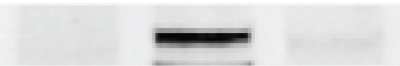

◀ transgenic pAMPK $\alpha$

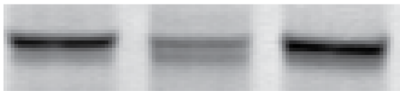

◀ endogenous pAMPK $\alpha$

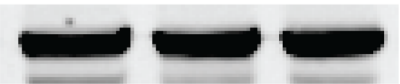

◀ Lamin C
